# Supplementary material for: Application of a coarse-grained model for the design of complex supramolecular networks
Source: Royal Society of Chemistry journal article supplement (doi:10.1039/c9me00122k), 2019-11-20
Supplement: c9me00122k1.pdf [file c9me00122k1.pdf]

## Supplementary Information

L. Baran, W. Rżysko

Cluster analysis method used by us is based on the criterion that if atom  $i$  is already in the cluster, the atom  $j$  will also be included if the interparticle distance is  $r_{ij} < d$ , where  $d$  is a threshold separation. However, as we have mentioned in the main text that for longer chains the larger clusters tend to glue one to another, this criterion could be insufficient, so we have also imposed the criterion based on the orientation of the molecules.

The results shown on bar chart (1) proves the observation written in the main text and corroborates with the snapshots.

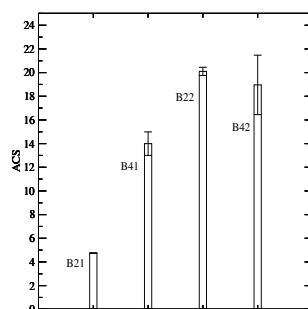

Figure 1: Average cluster size (ACS) for molecules **B** in the same conditions as from the Figures 3 and 4 in the main text. The error bar for molecule **B**<sub>21</sub> are smaller than the bar width.
